# Supplementary material
Source: HighWire-hosted journal article supplement (https://diabetes.diabetesjournals.org/content/suppl/2007/01/19/db06-1206)

**A** Total acyl-CoA species (nmol/g liver)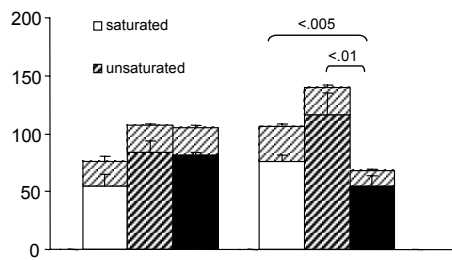**E** Total DAG species ( $\mu\text{mol/g liver}$ )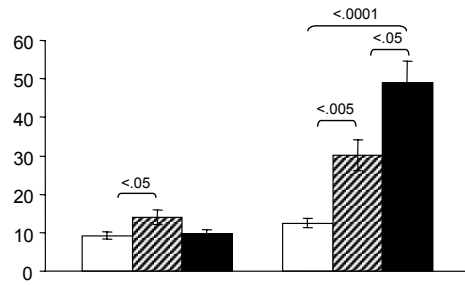**B** Acyl-CoA species including C16 (nmol/g liver)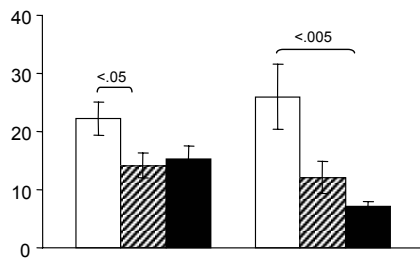**F** DAG species including C16 ( $\mu\text{mol/g liver}$ )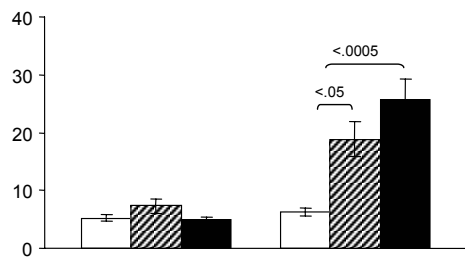**C** Acyl-CoA species including n-3 FA (nmol/g liver)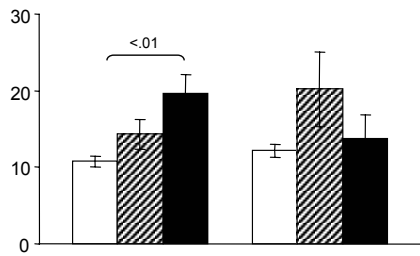**G** DAG species including n-3 FA ( $\mu\text{mol/g liver}$ )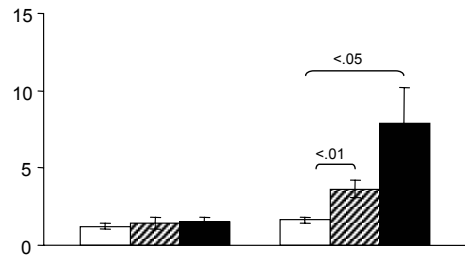**D** Acyl-CoA C18:2n-6 (nmol/g liver)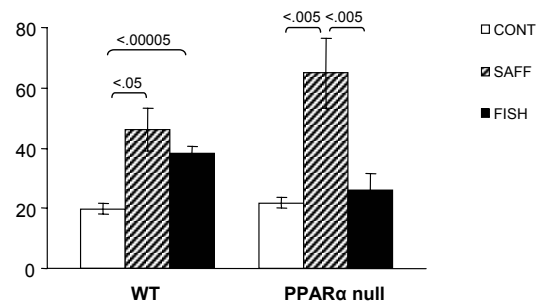**H** DAG including C18:2n-6 ( $\mu\text{mol/g liver}$ )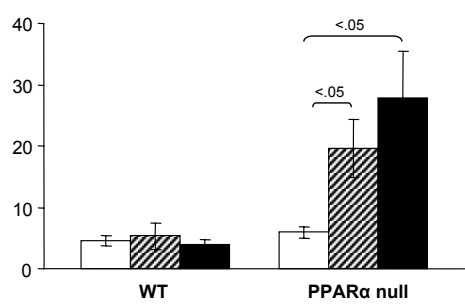

Supplement: db061206fig2.pdf [file db061206fig2.pdf]
