# Supplementary material
Source: HighWire-hosted journal article supplement (https://diabetes.diabetesjournals.org/content/suppl/2007/01/19/db06-1206)

**A** GINF (mg/min/kg)

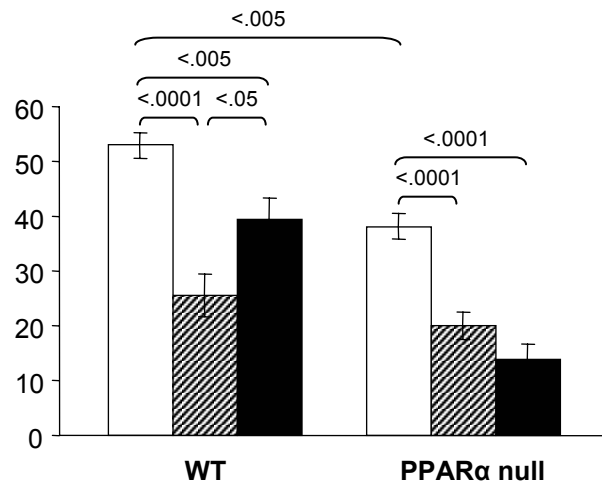

**B** Suppression HGP by Insulin (%)

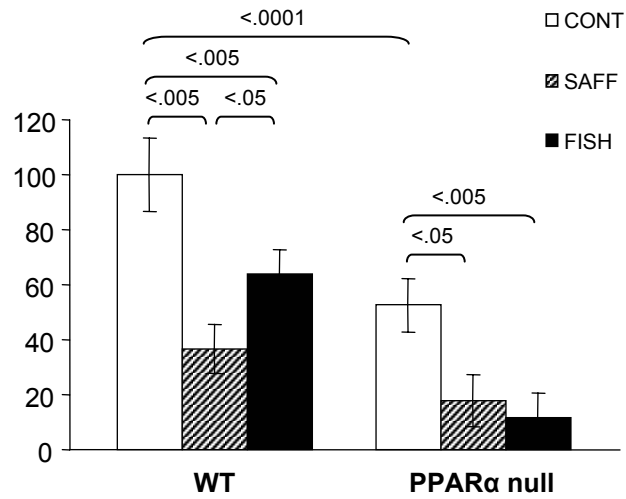

Supplement: db061206fig1.pdf [file db061206fig1.pdf]
